# Supplementary material
Source: PubMed Central journal article supplement (PMC3262682)

**Inflammatory cell profiles in the lungs of ets-2 (WT/WT) and ets-2 (A72/A72) mice following bleomycin administration**

|                                                                                                                                                 |                    |           |   |                                  | Differentials                    |                                  |                                  |
|-------------------------------------------------------------------------------------------------------------------------------------------------|--------------------|-----------|---|----------------------------------|----------------------------------|----------------------------------|----------------------------------|
| Days                                                                                                                                            | Genotype           | Treatment | n | Total cells<br>x 10 <sup>4</sup> | Macrophages<br>X 10 <sup>4</sup> | Neutrophils<br>X 10 <sup>4</sup> | Lymphocytes<br>X 10 <sup>4</sup> |
| 11                                                                                                                                              | Ets-2<br>(WT/WT)   | bleomycin | 5 | 7.2 ± 2.0                        | 6.7 ± 1.8                        | 0.3 ± 0.1                        | 0.2 ± 0.1                        |
| 11                                                                                                                                              | Ets-2<br>(A72/A72) | bleomycin | 4 | 1.6 ± 0.6                        | 1.6 ± 0.6                        | 0.03 ± 0.01                      | 0.02 ± 0.008                     |
| <b>p-value: ets-2 (WT/WT) vs<br/>ets-2 (A72/A72) at day 11.</b>                                                                                 |                    |           |   | <b>0.021</b>                     | <b>0.021</b>                     | <b>0.283</b>                     | <b>0.22</b>                      |
| 22                                                                                                                                              | Ets-2<br>(WT/WT)   | bleomycin | 5 | 2.8 ± 1.0                        | 2.7 ± 1.0                        | 0.09 ± 0.04                      | 0.006 ± 0.005                    |
| 22                                                                                                                                              | Ets-2<br>(A72/A72) | bleomycin | 5 | 11.6 ± 2.0                       | 10.8 ± 2.2                       | 0.8 ± 0.4                        | 0.07 ± 0.03                      |
| <b>p-value: ets-2 (WT/WT) vs<br/>ets-2 (A72/A72) at day 22.</b>                                                                                 |                    |           |   | <b>0.011</b>                     | <b>0.011</b>                     | <b>0.173</b>                     | <b>0.126</b>                     |
| 33                                                                                                                                              | Ets-2<br>(WT/WT)   | PBS       | 3 | 2.9 ± 0.6                        | 2.9 ± 0.6                        | None<br>detected                 | None<br>detected                 |
| 33                                                                                                                                              | Ets-2<br>(WT/WT)   | bleomycin | 5 | 12.0 ± 2.3                       | 12.0 ± 2.3                       | None<br>detected                 | None<br>detected                 |
| <b>p-value: ets-2 (WT/WT) bleomycin vs<br/>ets-2 (WT/WT) PBS at day 33.</b>                                                                     |                    |           |   | <b>0.02</b>                      | <b>0.009</b>                     |                                  |                                  |
| 33                                                                                                                                              | Ets-2<br>(A72/A72) | PBS       | 4 | 2.6 ± 0.5                        | 2.6 ± 0.5                        | None<br>detected                 | None<br>detected                 |
| 33                                                                                                                                              | Ets-2<br>(A72/A72) | bleomycin | 7 | 8.3 ± 2.0                        | 6.8 ± 1.4                        | 0.8 ± 0.6                        | 0.7 ± 0.6                        |
| <b>p-value: ets-2 (A72/A72) bleomycin vs<br/>ets-2 (A72/A72) PBS at day 33.</b>                                                                 |                    |           |   | <b>0.13</b>                      | <b>0.17</b>                      |                                  |                                  |
| <b>NOTE: Comparisons at day 33 between bleomycin or PBS treated ets-2 (WT/WT) and ets-2 (A72/A72) mice revealed no significant differences.</b> |                    |           |   |                                  |                                  |                                  |                                  |

Figure E1

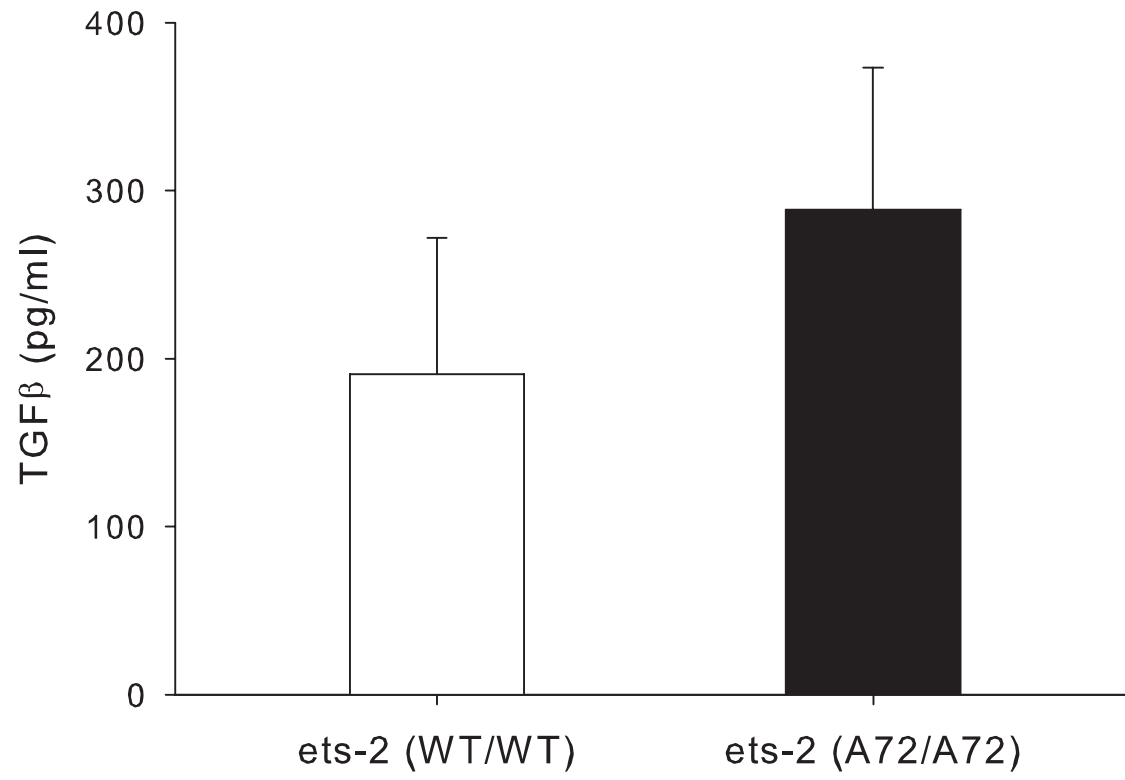

Figure E2

11-days

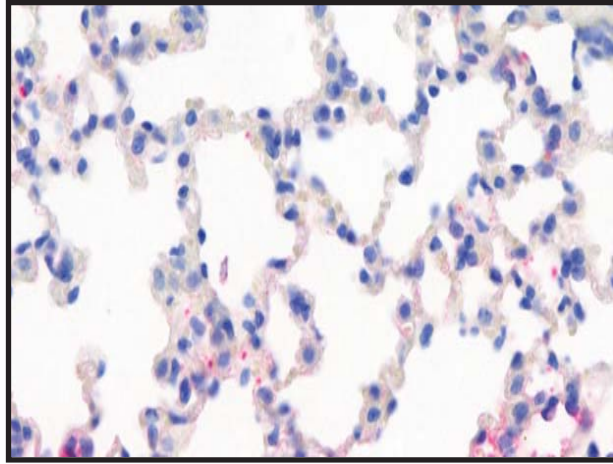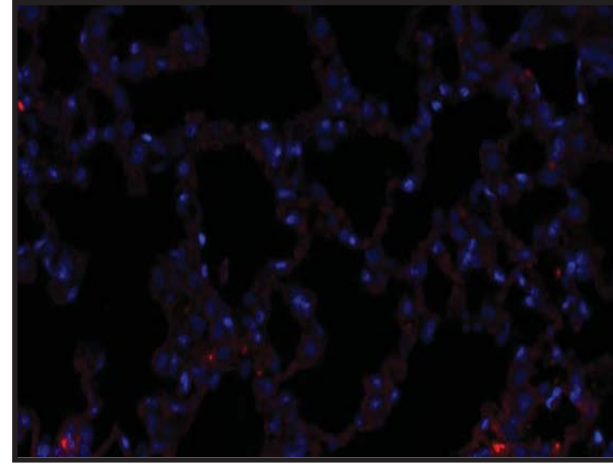

22-days

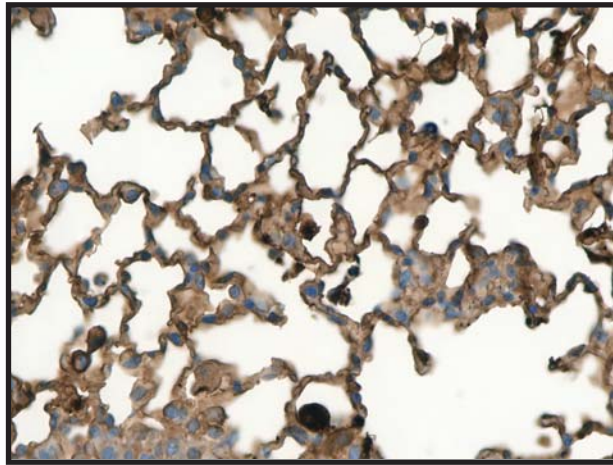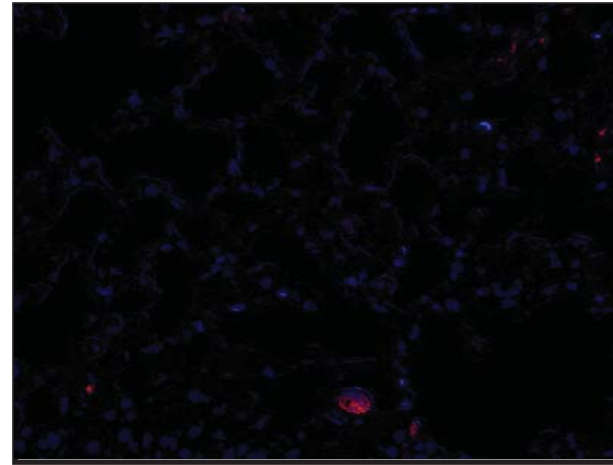

150 nm

Figure E3

A

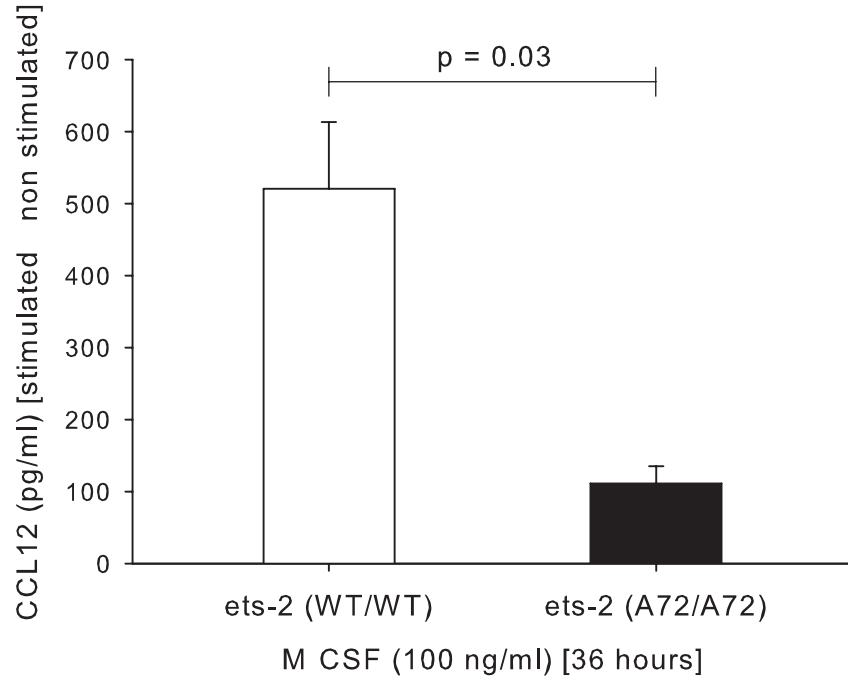

B

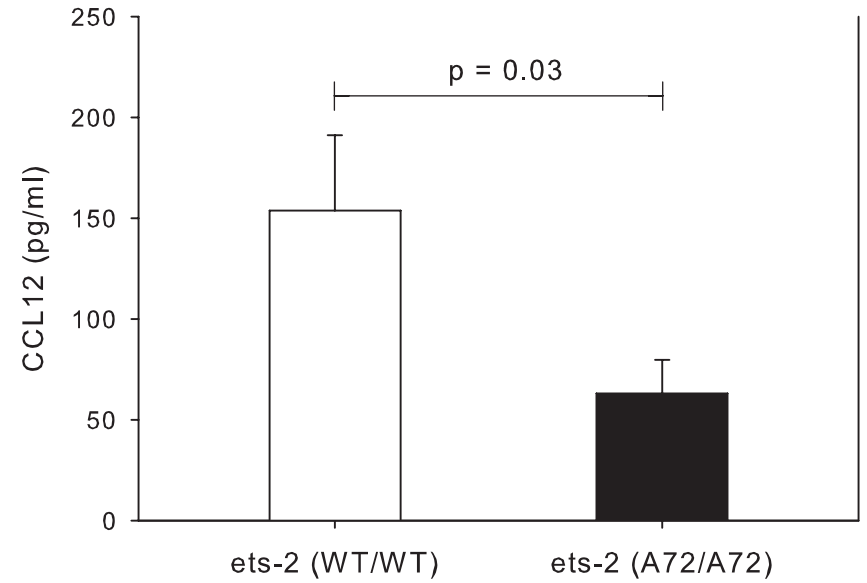

C

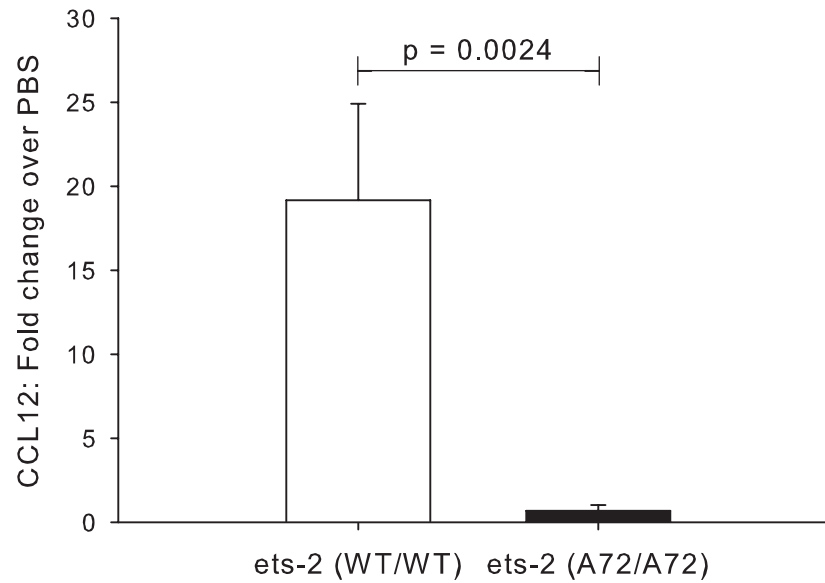

Figure E4

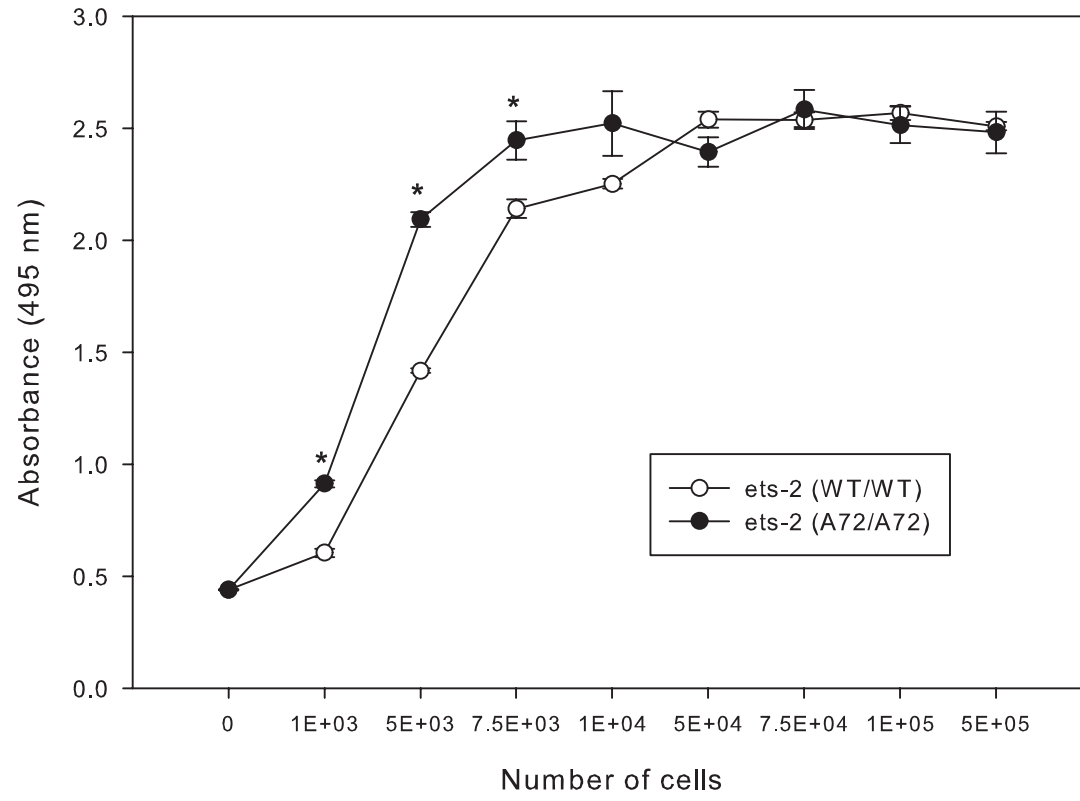

Supplement: supp_45.5.999_Baran_ODS_table_and_figures.pdf [file supp_45.5.999_Baran_ODS_table_and_figures.pdf]
